# Supplementary material
Source: publisher figshare collection journal article supplement (https://acs.figshare.com/ndownloader/files/4716841)
Supplement: Supplementary file 1 [file 4716841]

# Synthesis, Characterization, and Electrochemical Studies of $\beta,\beta'$ -Fused Metallocenoporphyrins

*Hong J. H. Wang,<sup>†</sup> Laurent Jaquinod,<sup>†</sup> Marilyn M. Olmstead,<sup>†</sup> M. Graça H. Vicente,<sup>†,‡</sup>*

*Karl M. Kadish,<sup>§</sup> Zhongping Ou,<sup>§</sup> and Kevin M. Smith,<sup>\*,†,‡</sup>*

Department of Chemistry, University of California, Davis, California 95616,

Department of Chemistry, Louisiana State University, Baton Rouge, Louisiana 70803,

and

Department of Chemistry, University of Houston, Houston, Texas 77204

## Contents

|                            |               |
|----------------------------|---------------|
| Cover Page                 | S1            |
| Figure S1                  | S2            |
| Figure S2                  | S3            |
| Table S1                   | S4            |
| CIF for compound <b>26</b> | Separate file |

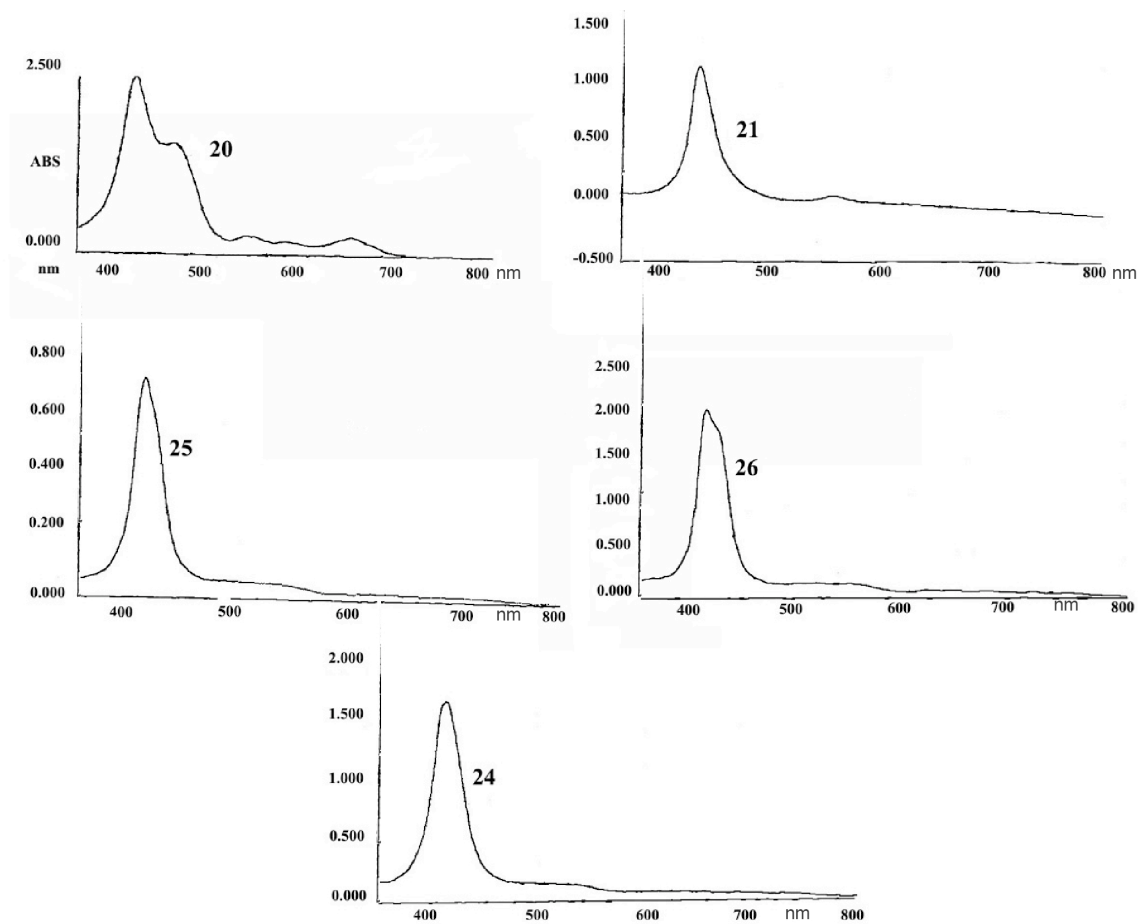

**Figure S1.** UV/Visible spectra ( $\text{CHCl}_3$ ) of bisporphyrinatoferrocenes (**24-26**) and mono-ruthenocenoporphyrins (**20, 21**)

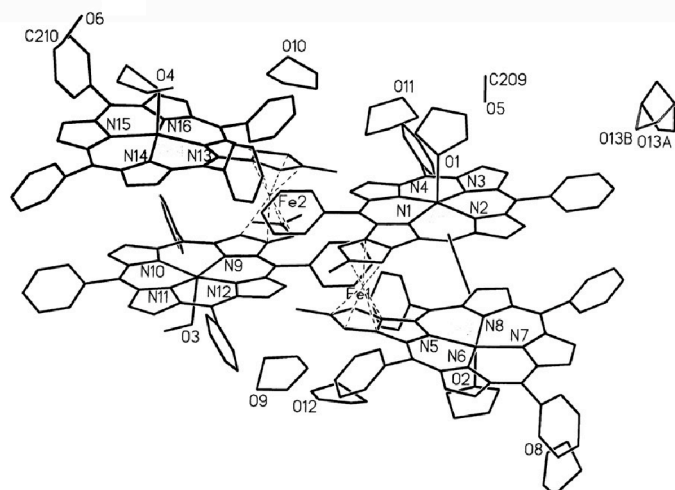

**Figure S2.** X-Ray crystal structure of bisporphyrinatoferrocene **26**: showing molecules in one asymmetric unit.

**Table S1.** Half-wave Potentials (V vs SCE) in PhCN Containing 0.1 M TBAP.

| compound     | oxidation         |                   |                        | reduction          |                    | $\Delta E_{1/2}^d$<br>(V) | ref       |
|--------------|-------------------|-------------------|------------------------|--------------------|--------------------|---------------------------|-----------|
|              | Por-centered      |                   | Mc-centered            | Por-centered       |                    |                           |           |
| (TPP)Ni      | 1.12 <sup>a</sup> |                   |                        | -1.23              | -1.78              | 2.35                      | 6         |
| Ruthenocene  |                   |                   | 0.60-0.78 <sup>b</sup> |                    |                    |                           | 7-9       |
| Ferrocene    |                   |                   | 0.49                   |                    |                    |                           | <i>tw</i> |
| Ni <b>2</b>  | 1.13 <sup>a</sup> |                   |                        | -1.31              | -1.85              | 2.44                      | <i>tw</i> |
| Ni <b>13</b> | 1.19              | 0.99              |                        | -1.36              | -1.95              | 2.35                      | <i>tw</i> |
| Ni <b>20</b> | 1.09              | 0.93 <sup>c</sup> | 0.58                   | -1.32              |                    | 2.25                      | <i>tw</i> |
| Ni <b>24</b> | 1.22 <sup>a</sup> | 1.22 <sup>a</sup> | 0.39                   | -1.24, -1.35       |                    | 2.46                      | <i>tw</i> |
| (TPP)Cu      | 1.31              | 1.02              |                        | -1.28              | -1.73              | 2.30                      | 6         |
| Cu <b>25</b> | 1.17 <sup>a</sup> | 1.17 <sup>a</sup> | 0.40                   | -1.38 <sup>a</sup> | -1.87 <sup>a</sup> | 2.55                      | <i>tw</i> |

<sup>a</sup>Two one-electron overlapping processes. <sup>b</sup>Irreversible two-electron process. The reported potentials are 0.60 V vs SCE in CH<sub>3</sub>CN, 0.1 M TBABF<sub>4</sub> (ref 7), 0.69 V vs Ag/AgClO<sub>4</sub> in CH<sub>3</sub>CN, 0.2 M LiClO<sub>4</sub> (ref 8) and 0.78 V vs SCE in CH<sub>3</sub>CN, 0.1 M TBABF<sub>4</sub> (ref 9), respectively. <sup>c</sup>E<sub>pa</sub> at a scan rate of 0.1 V/s. <sup>d</sup>HOMO-LUMO gap, the potential difference between the first porphyrin-centered reduction and oxidation. *tw* = this work.
